# Supplementary material
Source: Springer Nature journal article supplement (https://www.springermedizin.de/resource/supplementary/12960_2007_90_MOESM1_ESM.pdf/9570392)

**British Columbia**  
1991: 6.0  
2000: 6.7  
**2005: 5.9**  
 $\Delta$  1991-2005: 1.7% $\downarrow$   
 $\Delta$  2000-2005: 11.9% $\downarrow$

**CANADA**  
1991: 4.3  
2000: 5.0  
**2005: 4.8**  
 $\Delta$  1991-2005: 11.6% $\uparrow$   
 $\Delta$  2000-2005: 4.0% $\downarrow$

**Newfoundland & Labrador**  
1991: 2.1  
2000: 3.7  
**2005: 3.9**  
 $\Delta$  1991-2005: 85.7% $\uparrow$   
 $\Delta$  2000-2005: 5.4% $\uparrow$

**Prince Edward Island**  
1991: 2.5  
2000: 3.4  
**2005: 3.5**  
 $\Delta$  1991-2005: 40.0% $\uparrow$   
 $\Delta$  2000-2005: 2.9% $\uparrow$

**Alberta**  
1991: 5.5  
2000: 6.0  
**2005: 6.0**  
 $\Delta$  1991-2005: 0.0% $\uparrow$   
 $\Delta$  2000-2005: 0.0%

**Manitoba**  
1991: 3.9  
2000: 4.8  
**2005: 5.2**  
 $\Delta$  1991-2005: 33.3% $\uparrow$   
 $\Delta$  2000-2005: 8.3% $\uparrow$

**Québec**  
1991: 3.5  
2000: 4.5  
**2005: 4.8**  
 $\Delta$  1991-2005: 37.1% $\uparrow$   
 $\Delta$  2000-2005: 6.7% $\uparrow$

**Nova Scotia**  
1991: 3.8  
2000: 4.8  
**2005: 5.6**  
 $\Delta$  1991-2005: 47.4% $\uparrow$   
 $\Delta$  2000-2005: 16.7% $\uparrow$

**Saskatchewan**  
1991: 3.4  
2000: 5.8  
**2005: 5.4**  
 $\Delta$  1991-2005: 58.8% $\uparrow$   
 $\Delta$  2000-2005: 3.8% $\uparrow$

**Ontario**  
1991: 4.5  
2000: 4.6  
**2005: 4.2**  
 $\Delta$  1991-2005: -6.7% $\downarrow$   
 $\Delta$  2000-2005: -8.7% $\downarrow$

**New Brunswick**  
1991: 3.3  
2000: 5.4  
**2005: 5.6**  
 $\Delta$  1991-2005: 69.7% $\uparrow$   
 $\Delta$  2000-2005: 3.7% $\uparrow$

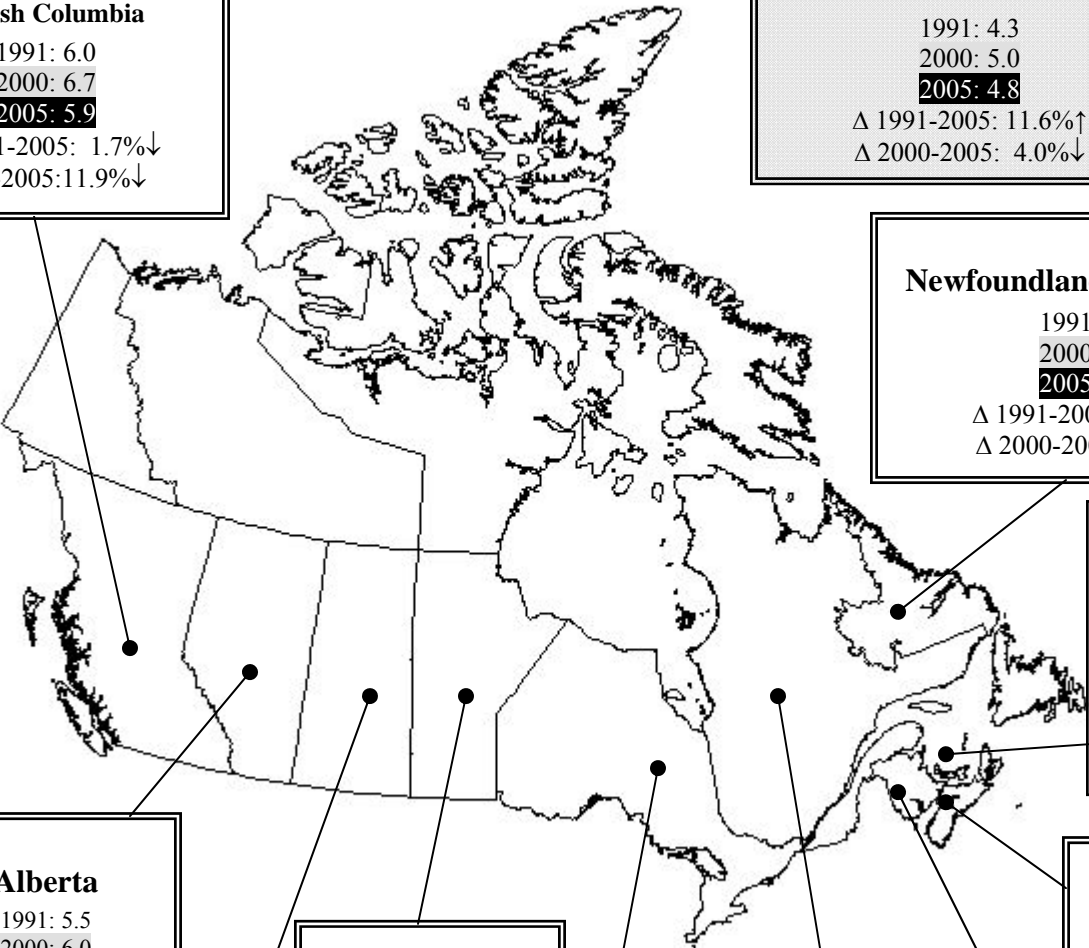

Supplement: MOESM1 [file 9570392]
